# Supplementary material
Source: Springer Nature journal article supplement (https://www.springermedizin.de/resource/supplementary/12904_2009_63_MOESM2_ESM.pdf/9518022)
Supplement: MOESM2 [file 9518022]

Potentially relevant  
identified references: 208

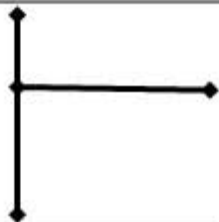

Papers excluded: 197

Based on information from the abstract: 186  
Not offering relevant clinical data: 6  
Fewer than 10 cases: 5

Studies selected: 11  
Duplications: 4  
Studies finally included: 7
